# Supplementary material for: How Do Variable Substitution Rates Influence Ka and Ks Calculations?
Source: PubMed Central journal article supplement — Genomics Proteomics Bioinformatics. 2009 Nov 25;7(3):116–27. doi: 10.1016/S1672-0229(08)60040-6 (PMC5054415; doi:10.1016/s1672-0229(08)60040-6), 2009-11-25
Supplement: mmc1.pdf [file mmc1.pdf]

## Supporting Online Material

Wang, D., *et al.* 2009. How do variable substitution rates influence Ka and Ks calculations? *Genomics Proteomics Bioinformatics* 7: 116-127.

DOI: 10.1016/S1672-0229(08)60040-6

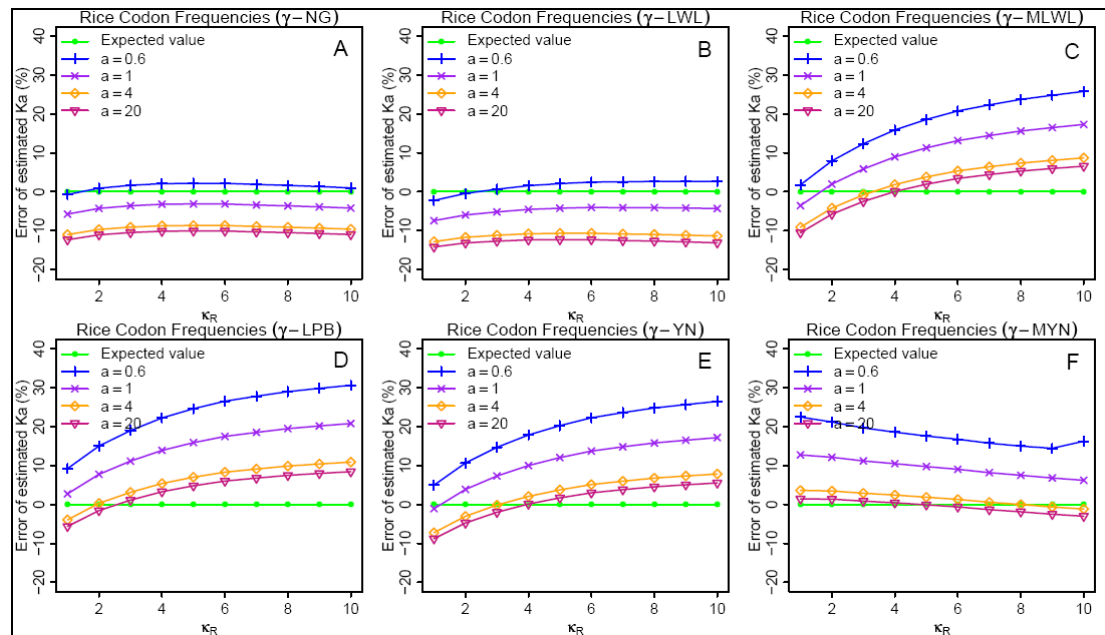

**Figure S1** Percentage errors of estimated Ka in the condition of expected  $\omega=0.3$ . We plotted percentage errors of Ka, averaging over 2,000 pairs of sequences by  $\gamma$ -NG,  $\gamma$ -LWL,  $\gamma$ -MLWL,  $\gamma$ -LPB,  $\gamma$ -YN, and  $\gamma$ -MYN, when  $\kappa_Y=3.75$  and  $\kappa_R$  varies from 1 to 10, in the condition of expected  $\omega=0.3$ . Sequences were simulated with the rice codon frequencies derived from rice protein-coding genes. The percentage error was calculated by the formula:  $100\% \times [(\text{estimated value}) - (\text{expected value})] / (\text{expected value})$ .

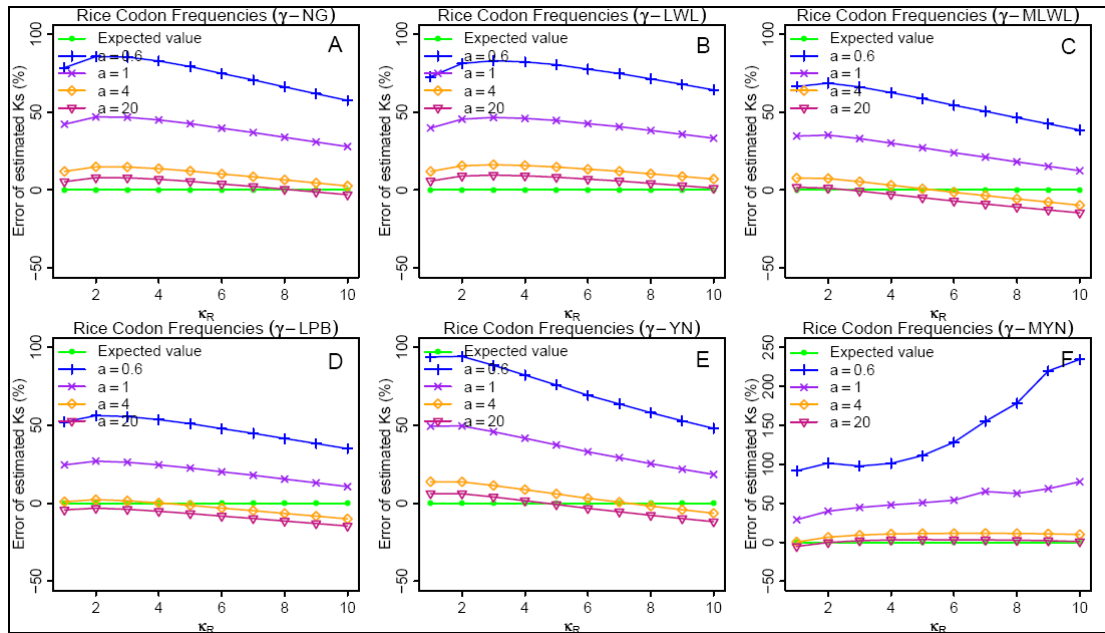

**Figure S2** Percentage errors of estimated  $K_s$  in the condition of expected  $\omega=0.3$ .

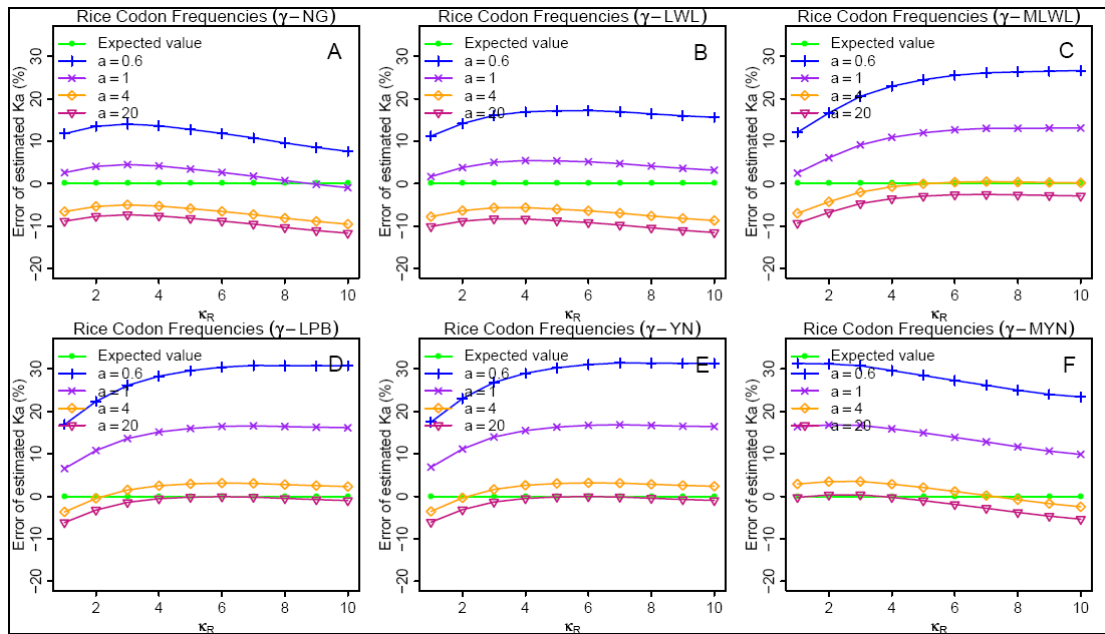

**Figure S3** Percentage errors of estimated  $K_a$  in the condition of expected  $\omega=1$ .

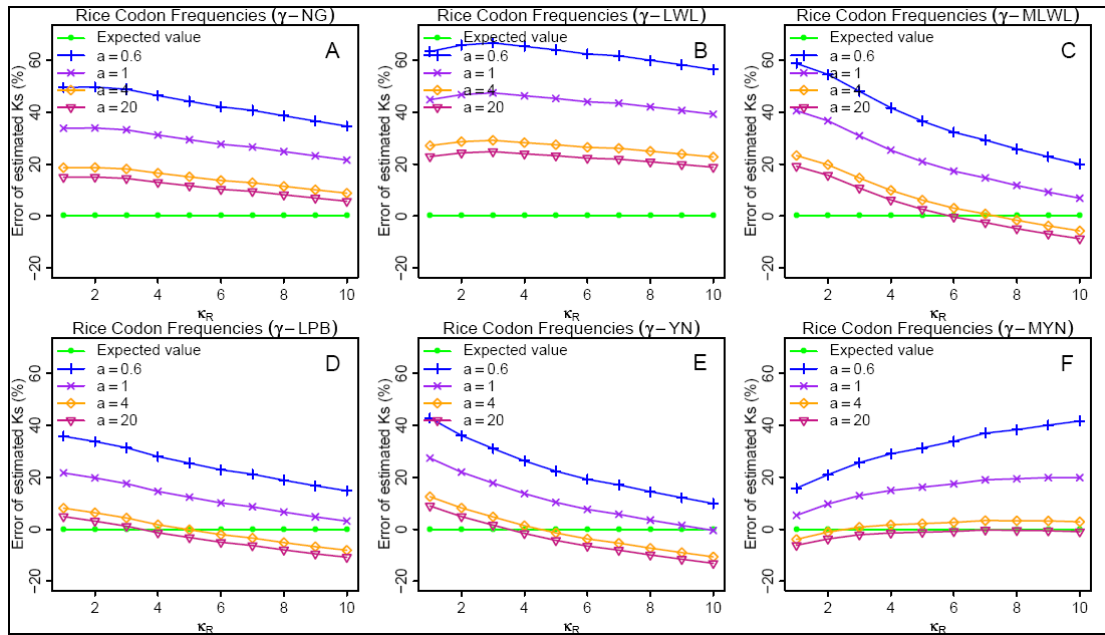

**Figure S4** Percentage errors of estimated  $K_s$  in the condition of expected  $\omega=1$ .

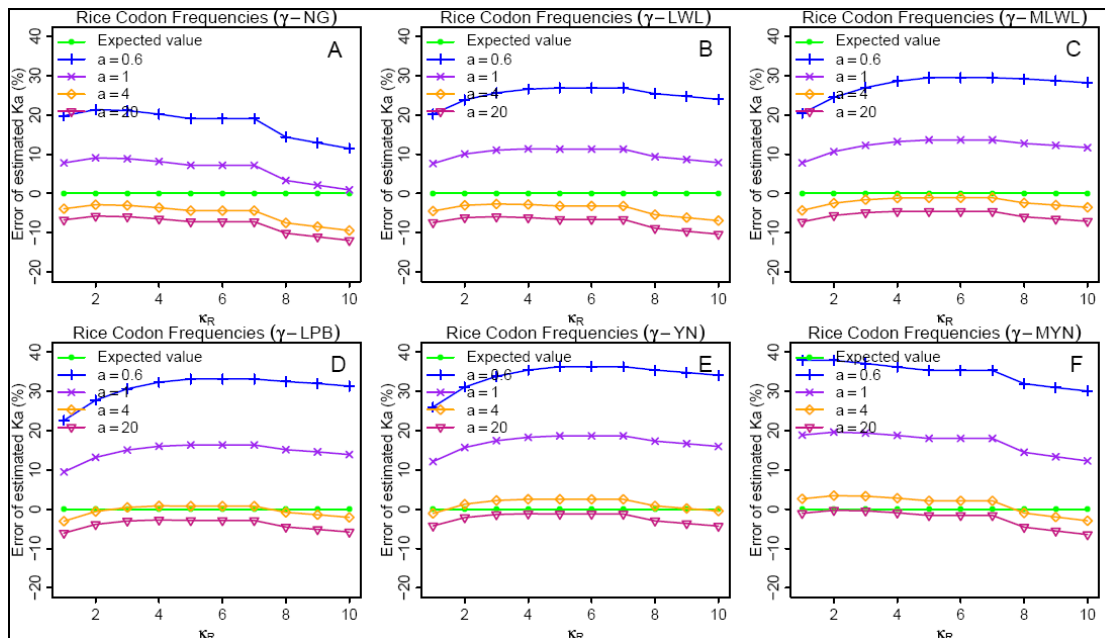

**Figure S5** Percentage errors of estimated  $K_a$  in the condition of expected  $\omega=3$ .

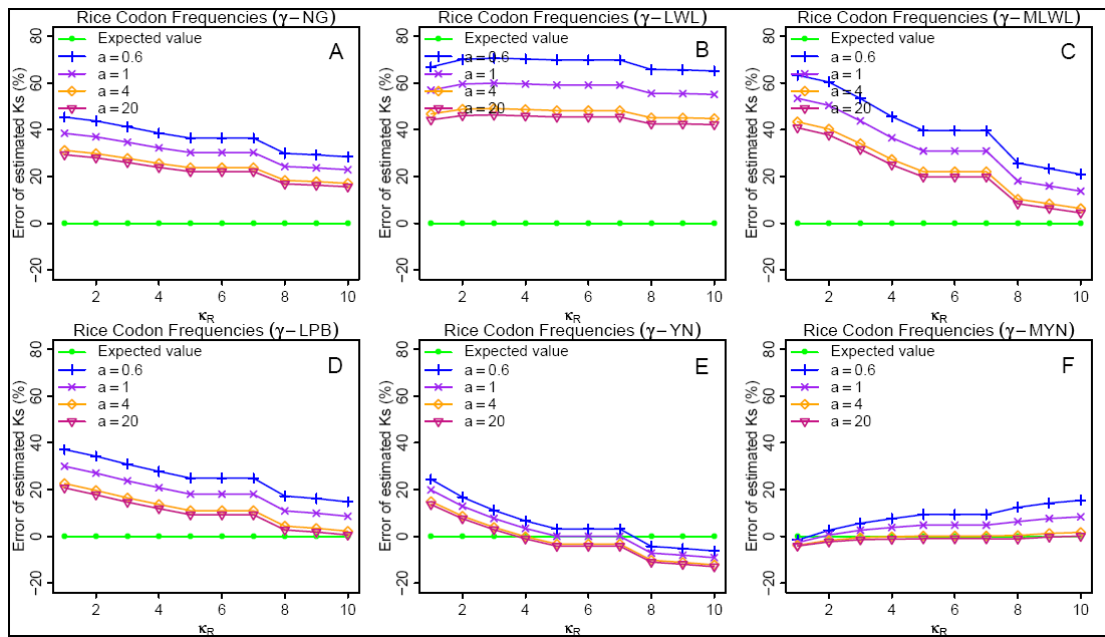

**Figure S6** Percentage errors of estimated Ks in the condition of expected  $\omega=3$ .

**Table S1 The optimal indexes of Ka, Ks and  $\omega$  based on a combination of six values of “a” and seven methods**

A. Optimal indexes of Ka estimates when  $\omega=0.3$

| <i>a</i> | $\gamma$ -NG  | $\gamma$ -LWL  | $\gamma$ -MLWL | $\gamma$ -LPB  | $\gamma$ -MLPB | $\gamma$ -YN   | $\gamma$ -MYN  |
|----------|---------------|----------------|----------------|----------------|----------------|----------------|----------------|
| 0.2      | 11547.54      | 19270.02       | 45690.11       | 68170.24       | 65472.78       | 59409.25       | 1615916        |
| 0.6      | <b>26.762</b> | <b>46.5106</b> | 3583.898       | 5906.709       | 5509.021       | 4103.508       | 3214.378       |
| 1        | 151.3296      | 241.4875       | 1452.381       | 2500.191       | 2288.53        | 1536.083       | 926.1002       |
| 4        | 865.4107      | 1259.782       | 384.0482       | 577.932        | 518.8555       | 302.3096       | 46.34939       |
| 20       | 1141.536      | 1643.657       | 291.8221       | 340.7176       | 314.1287       | 206.6636       | <b>26.0993</b> |
| $\infty$ | 1215.59       | 1745.952       | <b>279.856</b> | <b>297.192</b> | <b>278.252</b> | <b>195.967</b> | 33.0314        |

B. Optimal indexes of Ks estimates when  $\omega=0.3$

| <i>a</i> | $\gamma$ -NG   | $\gamma$ -LWL  | $\gamma$ -MLWL | $\gamma$ -LPB  | $\gamma$ -MLPB | $\gamma$ -YN   | $\gamma$ -MYN  |
|----------|----------------|----------------|----------------|----------------|----------------|----------------|----------------|
| 0.2      | 3082012        | 2981870        | 2258079        | 1735173        | 1787809        | 3610240        | 34605799       |
| 0.6      | 55902.95       | 57327.73       | 31747.3        | 23120.76       | 24272.01       | 55233.91       | 226132.5       |
| 1        | 15783.32       | 17221.99       | 6899.777       | 4379.574       | 4774.601       | 13507.57       | 30977.05       |
| 4        | 1168.573       | 1673.119       | <b>353.971</b> | <b>255.337</b> | <b>257.101</b> | 686.887        | 962.5671       |
| 20       | 263.1357       | 468.3207       | 660.1346       | 791.9355       | 734.2831       | <b>432.199</b> | 82.79042       |
| $\infty$ | <b>168.859</b> | <b>298.789</b> | 825.3646       | 997.0964       | 926.6511       | 501.2602       | <b>57.3466</b> |

C. Optimal indexes of  $\omega$  estimates when  $\omega=0.3$

| <i>a</i> | $\gamma$ -NG  | $\gamma$ -LWL  | $\gamma$ -MLWL | $\gamma$ -LPB | $\gamma$ -MLPB | $\gamma$ -YN   | $\gamma$ -MYN  |
|----------|---------------|----------------|----------------|---------------|----------------|----------------|----------------|
| 0.2      | 0.520786      | 0.49793        | 0.400133       | 0.324493      | 0.333247       | 0.429116       | 0.308941       |
| 0.6      | 0.140898      | 0.14589        | 0.050369       | 0.022864      | 0.026797       | 0.074154       | 0.128693       |
| 1        | 0.076312      | 0.086779       | 0.018305       | <b>0.0075</b> | <b>0.00907</b> | 0.028887       | 0.047647       |
| 4        | 0.023863      | 0.035786       | <b>0.01493</b> | 0.019197      | 0.017591       | <b>0.01104</b> | 0.003026       |
| 20       | 0.014569      | 0.025608       | 0.020829       | 0.027804      | 0.025273       | 0.013745       | <b>0.00104</b> |
| $\infty$ | <b>0.0126</b> | <b>0.02331</b> | 0.022782       | 0.030323      | 0.027555       | 0.014966       | 0.001218       |

D. Optimal indexes of Ka estimates when  $\omega=1$

| <i>a</i> | $\gamma$ -NG   | $\gamma$ -LWL  | $\gamma$ -MLWL | $\gamma$ -LPB | $\gamma$ -MLPB | $\gamma$ -YN   | $\gamma$ -MYN  |
|----------|----------------|----------------|----------------|---------------|----------------|----------------|----------------|
| 0.2      | 58907.95       | 122534.3       | 152935.5       | 190618.5      | 186805         | 209668.6       | 1767742        |
| 0.6      | 1346.055       | 2518.576       | 5405.957       | 7853.904      | 7672.49        | 8201.335       | 7759.976       |
| 1        | <b>84.5399</b> | <b>190.445</b> | 1231.588       | 2171.984      | 2107.548       | 2257.878       | 2009.991       |
| 4        | 490.2283       | 488.9044       | <b>71.9116</b> | 69.31302      | 69.25104       | 71.45276       | <b>56.4888</b> |
| 20       | 846.2706       | 931.8537       | 211.2094       | <b>52.528</b> | <b>61.723</b>  | <b>50.4726</b> | 77.65364       |
| $\infty$ | 948.914        | 1061.436       | 269.6196       | 76.96815      | 88.08028       | 74.54203       | 110.9996       |

E. Optimal indexes of Ks estimates when  $\omega=1$

| $a$      | $\gamma$ -NG   | $\gamma$ -LWL  | $\gamma$ -MLWL | $\gamma$ -LPB  | $\gamma$ -MLPB | $\gamma$ -YN   | $\gamma$ -MYN |
|----------|----------------|----------------|----------------|----------------|----------------|----------------|---------------|
| 0.2      | 254219.3       | 476868.4       | 292138.5       | 178142.5       | 179026.7       | 141584.2       | 6071823       |
| 0.6      | 18824.58       | 38940.68       | 15259.76       | 6646.666       | 6760.638       | 6390.708       | 10466.78      |
| 1        | 8305.24        | 19374.12       | 5804.733       | 1780.699       | 1863.829       | 1943.952       | 2602.04       |
| 4        | 2183.109       | 7035.53        | 1340.185       | <b>280.365</b> | <b>342.608</b> | <b>538.866</b> | 71.47309      |
| 20       | 1305.79        | 4997.238       | 927.8209       | 380.2644       | 438.6278       | 636.4287       | <b>62.364</b> |
| $\infty$ | <b>1127.42</b> | <b>4554.74</b> | <b>865.451</b> | 431.4219       | 488.9049       | 686.2089       | 93.00846      |

F. Optimal indexes of  $\omega$  estimates when  $\omega=1$

| $a$      | $\gamma$ -NG   | $\gamma$ -LWL  | $\gamma$ -MLWL | $\gamma$ -LPB  | $\gamma$ -MLPB | $\gamma$ -YN   | $\gamma$ -MYN  |
|----------|----------------|----------------|----------------|----------------|----------------|----------------|----------------|
| 0.2      | 0.680797       | 0.84767        | 0.345015       | 0.323869       | 0.341138       | 1.127662       | 1.372097       |
| 0.6      | 0.3752         | 0.694656       | 0.175829       | 0.117227       | 0.129481       | 0.234247       | 0.077914       |
| 1        | 0.326145       | 0.656782       | 0.149473       | 0.094841       | 0.106057       | 0.172474       | 0.043912       |
| 4        | 0.276189       | 0.612876       | 0.123537       | 0.074518       | 0.084615       | 0.123632       | 0.022785       |
| 20       | 0.263804       | 0.601034       | 0.117321       | 0.069847       | 0.079656       | 0.113416       | 0.019249       |
| $\infty$ | <b>0.26077</b> | <b>0.59807</b> | <b>0.1158</b>  | <b>0.06872</b> | <b>0.07846</b> | <b>0.11102</b> | <b>0.01847</b> |

G. Optimal indexes of Ka estimates when  $\omega=3$

| $a$      | $\gamma$ -NG   | $\gamma$ -LWL  | $\gamma$ -MLWL | $\gamma$ -LPB  | $\gamma$ -MLPB | $\gamma$ -YN   | $\gamma$ -MYN  |
|----------|----------------|----------------|----------------|----------------|----------------|----------------|----------------|
| 0.2      | 117427.5       | 268509.4       | 283279.6       | 326755.9       | 321937.9       | 389226.3       | 2517063        |
| 0.6      | 3290.478       | 6330.325       | 7626.924       | 9599.631       | 9529.177       | 11594.53       | 12160.55       |
| 1        | 459.1958       | 1017.903       | 1504.38        | 2180.039       | 2171.417       | 2906.486       | 2975.361       |
| 4        | <b>318.135</b> | <b>188.506</b> | <b>58.6364</b> | <b>19.4999</b> | <b>20.0034</b> | <b>34.0555</b> | <b>64.5459</b> |
| 20       | 673.8138       | 570.9903       | 316.4082       | 174.011        | 171.1972       | 71.22115       | 103.1384       |
| $\infty$ | 783.6474       | 696.6727       | 413.0874       | 249.2517       | 245.3681       | 120.4233       | 152.7502       |

H. Optimal indexes of Ks estimates when  $\omega=3$

| $a$      | $\gamma$ -NG   | $\gamma$ -LWL  | $\gamma$ -MLWL | $\gamma$ -LPB  | $\gamma$ -MLPB | $\gamma$ -YN   | $\gamma$ -MYN  |
|----------|----------------|----------------|----------------|----------------|----------------|----------------|----------------|
| 0.2      | 55840.05       | 191942.6       | 102904.4       | 50192.05       | 47548.5        | 7604.48        | 428626.3       |
| 0.6      | 13680.85       | 46729.61       | 18906.76       | 6913.527       | 6467.506       | 1159.572       | 955.1489       |
| 1        | 9492.459       | 33548.46       | 12275.49       | 3896.237       | 3639.276       | 829.01         | 266.5879       |
| 4        | 5916.31        | 22341.78       | 7075.586       | 1756.811       | 1659.059       | <b>719.589</b> | <b>22.1801</b> |
| 20       | 5140.708       | 19895.41       | 6023.675       | 1372.149       | 1309.021       | 733.6384       | 29.34963       |
| $\infty$ | <b>4957.59</b> | <b>19315.7</b> | <b>5779.83</b> | <b>1286.85</b> | <b>1231.92</b> | 739.8674       | 35.28303       |

I. Optimal indexes of  $\omega$  estimates when  $\omega=3$

| $a$      | $\gamma$ -NG   | $\gamma$ -LWL  | $\gamma$ -MLWL | $\gamma$ -LPB  | $\gamma$ -MLPB | $\gamma$ -YN   | $\gamma$ -MYN  |
|----------|----------------|----------------|----------------|----------------|----------------|----------------|----------------|
| 0.2      | 7.395717       | <b>3.81038</b> | 25.56014       | 57.74035       | 61.63727       | 250.1332       | 742.1982       |
| 0.6      | <b>0.80107</b> | 4.44375        | <b>1.24481</b> | 1.42028        | 1.838754       | 13.50247       | 10.38286       |
| 1        | 1.96461        | 6.751934       | 1.858692       | <b>0.40606</b> | <b>0.58259</b> | 5.513446       | 3.636866       |
| 4        | 3.668106       | 9.447704       | 3.212627       | 0.692306       | 0.6752         | 1.42975        | 0.535923       |
| 20       | 4.171876       | 10.16467       | 3.649382       | 0.94639        | 0.888573       | 0.939573       | 0.22437        |
| $\infty$ | 4.300364       | 10.34319       | 3.761977       | 1.019101       | 0.951723       | <b>0.84778</b> | <b>0.17253</b> |

**Table S2 Substitution rate matrices for Markov models of nucleotide substitution used in this study (I)**

| Model                                         | From | To                         |                            |                            |                            |
|-----------------------------------------------|------|----------------------------|----------------------------|----------------------------|----------------------------|
|                                               |      | T                          | C                          | A                          | G                          |
| JC69 (Jukes and Cantor 1969) (2)              | T    | –                          | $\alpha$                   | $\alpha$                   | $\alpha$                   |
|                                               | C    | $\alpha$                   | –                          | $\alpha$                   | $\alpha$                   |
|                                               | A    | $\alpha$                   | $\alpha$                   | –                          | $\alpha$                   |
|                                               | G    | $\alpha$                   | $\alpha$                   | $\alpha$                   | –                          |
| K80 (Kimura 1980) (3)                         | T    | –                          | $\alpha$                   | $\beta$                    | $\beta$                    |
|                                               | C    | $\alpha$                   | –                          | $\beta$                    | $\beta$                    |
|                                               | A    | $\beta$                    | $\beta$                    | –                          | $\alpha$                   |
|                                               | G    | $\beta$                    | $\beta$                    | $\alpha$                   | –                          |
| F84 (Felsenstein 1984) (4)                    | T    | –                          | $(1+\kappa/g_Y) \beta g_C$ | $\beta g_A$                | $\beta g_G$                |
|                                               | C    | $(1+\kappa/g_Y) \beta g_T$ | –                          | $\beta g_A$                | $\beta g_G$                |
|                                               | A    | $\beta g_T$                | $\beta g_C$                | –                          | $(1+\kappa/g_R) \beta g_G$ |
|                                               | G    | $\beta g_T$                | $\beta g_C$                | $(1+\kappa/g_R) \beta g_A$ | –                          |
| HKY85 (Hasegawa <i>et al.</i> 1984, 1985) (5) | T    | –                          | $\alpha g_C$               | $\beta g_A$                | $\beta g_G$                |
|                                               | C    | $\alpha g_T$               | –                          | $\beta g_A$                | $\beta g_G$                |
|                                               | A    | $\beta g_T$                | $\beta g_C$                | –                          | $\alpha g_G$               |
|                                               | G    | $\beta g_T$                | $\beta g_C$                | $\alpha g_A$               | –                          |
| TN93 (Tamura and Nei 1993) (6)                | T    | –                          | $\alpha_2 g_C$             | $\beta g_A$                | $\beta g_G$                |
|                                               | C    | $\alpha_2 g_T$             | –                          | $\beta g_A$                | $\beta g_G$                |
|                                               | A    | $\beta g_T$                | $\beta g_C$                | –                          | $\alpha_1 g_G$             |
|                                               | G    | $\beta g_T$                | $\beta g_C$                | $\alpha_1 g_A$             | –                          |

Note: The diagonals of the matrix are determined by the requirement that each row sums to 0. The equilibrium distribution is  $\pi = (1/4, 1/4, 1/4, 1/4)$  under JC69 and K80, and  $\pi = (g_T, g_C, g_A, g_G)$  under F84, HKY85, and TN93.  $\alpha$ , transitional rate;  $\beta$ , transversional rate;  $\alpha_1$ , transitional rate between purines;  $\alpha_2$ , transitional rate between pyrimidines;  $g_N$ , frequencies of nucleotide N, where  $N \in \{T, C, A, G\}$ ;  $g_R = g_A + g_G$ ;  $g_Y = g_T + g_C$ .



## A survey of gamma distribution

We assume that the rate of nucleotide substitution  $\lambda$  approximately follows the gamma distribution ( $I$ ):

$$f(\lambda) = \frac{b^a}{\tau(a)} e^{-b\lambda} \lambda^{a-1} \quad (S1)$$

where  $a = \bar{\lambda}^2 / V(\lambda)$  and  $b = a / \bar{\lambda}$ ,  $\bar{\lambda}$  and  $V(\lambda)$  is the mean and variance of  $\lambda$ , respectively, and  $\tau(a)$  is the gamma function. Here note that  $a$  is the square of the inverse of the coefficient of variation. To avoid using too many parameters, we set  $b = a$  so that the mean of the distribution is 1, with variance  $1/a$ . The shape parameter  $a$  is then inversely related to the extent of rate variation at sites.

## Deductions of related parameters based on gamma distribution

### (1) JC69 model

We directly describe the proportion of nucleotide sites showing differences ( $P$ ) between two sequences that diverged  $t$  evolutionary time units ago:

$$P = \frac{3}{4} - \frac{3}{4} \exp(-4\alpha t) \quad (S2)$$

Then, we can get the transformation:

$$\alpha t = -\frac{1}{4} \log_e \left( 1 - \frac{4}{3} P \right) \quad (S3)$$

Hence, the formula for estimating  $d$  is as follows:

$$d = 3\alpha t = -\frac{3}{4} \log_e \left( 1 - \frac{4}{3} P \right) \quad (S4)$$

Therefore, if  $\lambda$  or  $\alpha$  follows the gamma distribution, the mean of  $P$  is given by (7):

$$\bar{P} = \int_0^\infty P f(\lambda) d\lambda = \frac{3}{4} - \frac{3}{4} \left[ \frac{a}{a + 4\alpha t} \right]^a \quad (S5)$$

Then, we can get the transformation:

$$\frac{a}{\alpha t} = \frac{a}{4} \left[ \left( 1 - \frac{4}{3} \bar{P} \right)^{-\frac{1}{a}} - 1 \right] \quad (S6)$$

Hence, the formula for estimating  $\bar{d}$  is as follows:

$$\bar{d} = 3\bar{\alpha}t = \frac{3a}{4} \left[ \left( 1 - \frac{4}{3}\bar{P} \right)^{-1/a} - 1 \right] \quad (S7)$$

## (2) K80 (K2P) model

We directly describe the proportion of nucleotide sites showing transitional differences ( $P$ ) and of those showing transversional differences ( $Q$ ) between two sequences that diverged  $t$  evolutionary time units ago:

$$P = \frac{1}{4} + \frac{1}{4} \exp(-4\beta t) - \frac{1}{2} \exp[-2(\alpha + \beta)t] \quad (S8)$$

$$Q = \frac{1}{2} - \frac{1}{2} \exp(-4\beta t) \quad (S9)$$

Then, we can get the transformations:

$$\alpha t = -\frac{1}{2} \log_e(1 - 2P - Q) + \frac{1}{4} \log_e(1 - 2Q) \quad (S10)$$

$$\beta t = -\frac{1}{4} \log_e(1 - 2Q) \quad (S11)$$

Hence, the formulae for estimating  $d$  and  $\kappa$  are as follows:

$$d = (\alpha + 2\beta)t = -\frac{1}{2} \log_e(1 - 2P - Q) - \frac{1}{4} \log_e(1 - 2Q) \quad (S12)$$

$$\kappa = \frac{\alpha}{\beta} = \frac{2 \log_e(1 - 2P - Q)}{\log_e(1 - 2Q)} - 1 \quad (S13)$$

Therefore, if  $\lambda$  or  $\alpha, \beta$  follows the gamma distribution, the means of  $P$  and  $Q$  are given by (8):

$$\bar{P} = \int_0^\infty P f(\lambda) d\lambda = \frac{1}{4} + \frac{1}{4} \left[ \frac{a}{a + 4\beta t} \right]^a - \frac{1}{2} \left[ \frac{a}{a + 2(\alpha + \beta)t} \right]^a \quad (S14)$$

$$\bar{Q} = \int_0^\infty Q f(\lambda) d\lambda = \frac{1}{2} - \frac{1}{2} \left[ \frac{a}{a + 4\beta t} \right]^a \quad (S15)$$

Then, we can get the transformations:

$$\bar{\alpha}t = \frac{a}{2} \left[ \left( 1 - 2\bar{P} - \bar{Q} \right)^{-1/a} - 1 \right] - \frac{a}{4} \left[ \left( 1 - 2\bar{Q} \right)^{-1/a} - 1 \right] \quad (S16)$$

$$\bar{\beta}t = \frac{a}{4} \left[ \left( 1 - 2\bar{Q} \right)^{-1/a} - 1 \right] \quad (S17)$$

Hence, the formulae for estimating  $\bar{d}$  and  $\bar{\kappa}$  are as follows:

$$\bar{d} = \overline{(\alpha + 2\beta)t} = \frac{a}{2} \left[ (1 - 2\bar{P} - \bar{Q})^{-1/a} + \frac{1}{2} (1 - 2\bar{Q})^{-1/a} - \frac{3}{2} \right] \quad (\text{S18})$$

$$\bar{\kappa} = \frac{\bar{\alpha}}{\bar{\beta}} = \frac{2 \left[ (1 - 2\bar{P} - \bar{Q})^{-1/a} - 1 \right]}{(1 - 2\bar{Q})^{-1/a} - 1} - 1 \quad (\text{S19})$$

### (3) F84 model

We directly describe the proportion of nucleotide sites showing transitional differences ( $P$ ) and of those showing transversional differences ( $Q$ ) between two sequences that diverged  $t$  evolutionary time units ago:

$$P = 2(g_T g_C + g_A g_G) + 2 \left( \frac{g_T g_C g_R}{g_Y} + \frac{g_A g_G g_Y}{g_R} \right) \exp(-\beta t) - 2 \left( \frac{g_T g_C}{g_Y} + \frac{g_A g_G}{g_R} \right) \exp[-(\kappa + 1)\beta t] \quad (\text{S20})$$

$$Q = 2g_Y g_R [1 - \exp(-\beta t)] \quad (\text{S21})$$

Let

$$h = (\kappa + 1)\beta t = -\log_e \left( 1 - \frac{1}{2 \left[ (g_T g_C / g_Y) + (g_A g_G / g_R) \right]} P - \frac{[(g_T g_C g_R / g_Y) + (g_A g_G g_Y / g_R)] Q}{2(g_T g_C g_R + g_A g_G g_Y)} \right) \quad (\text{S22})$$

$$i = \beta t = -\log_e \left( 1 - \frac{1}{2g_Y g_R} Q \right) \quad (\text{S23})$$

Then we get

$$\begin{aligned} d &= 2(g_T g_C + g_A g_G + g_Y g_R)\beta t + 2(g_T g_C / g_Y + g_A g_G / g_R)\kappa\beta t \\ &= 2 \left( \frac{g_T g_C}{g_Y} + \frac{g_A g_G}{g_R} \right) h - 2 \left( \frac{g_T g_C g_R}{g_Y} + \frac{g_A g_G g_Y}{g_R} - g_Y g_R \right) i \end{aligned} \quad (\text{S24})$$

$$\kappa = \frac{(\kappa + 1)\beta t - \beta t}{\beta t} = \frac{(\kappa + 1)\beta t}{\beta t} - 1 = \frac{h}{i} - 1 \quad (\text{S25})$$

Therefore, if  $\lambda$  or  $\beta$  follows the gamma distribution, the means of  $P$  and  $Q$  are given by (1):

$$\begin{aligned} \bar{P} &= \int_0^\infty P f(\lambda) d\lambda \\ &= 2(g_T g_C + g_A g_G) + 2 \left( \frac{g_T g_C g_R}{g_Y} + \frac{g_A g_G g_Y}{g_R} \right) \left( \frac{a}{a + \beta t} \right)^a - 2 \left( \frac{g_T g_C}{g_Y} + \frac{g_A g_G}{g_R} \right) \left[ \frac{a}{a + (\kappa + 1)\beta t} \right]^a \end{aligned} \quad (\text{S26})$$

$$\bar{Q} = \int_0^\infty Qf(\lambda)d\lambda = 2g_Y g_R \left[ 1 - \left( \frac{a}{a + \beta t} \right)^a \right] \quad (S27)$$

Let

$$\bar{h} = \overline{(\kappa + 1)\beta t} = a \left\{ \left[ 1 - \frac{1}{2(g_T g_C / g_Y + g_A g_G / g_R)} \bar{P} - \frac{g_T g_C g_R / g_Y + g_A g_G g_Y / g_R}{2(g_T g_C g_R + g_A g_G g_Y)} \bar{Q} \right]^{-1/a} - 1 \right\} \quad (S28)$$

$$\bar{i} = \bar{\beta t} = a \left[ \left( 1 - \frac{1}{2g_Y g_R} \bar{Q} \right)^{-1/a} - 1 \right] \quad (S29)$$

Then we get

$$\begin{aligned} \bar{d} &= 2(g_T g_C + g_A g_G + g_Y g_R) \bar{\beta t} + 2(g_T g_C / g_Y + g_A g_G / g_R) \bar{\kappa} \beta t \\ &= 2 \left( \frac{g_T g_C}{g_Y} + \frac{g_A g_G}{g_R} \right) \bar{h} - 2 \left( \frac{g_T g_C g_R}{g_Y} + \frac{g_A g_G g_Y}{g_R} - g_Y g_R \right) \bar{i} \end{aligned} \quad (S30)$$

$$\bar{\kappa} = \frac{\overline{(\kappa + 1)\beta t} - \bar{\beta t}}{\bar{\beta t}} = \frac{\overline{(\kappa + 1)\beta t}}{\bar{\beta t}} - 1 = \frac{\bar{h}}{\bar{i}} - 1 \quad (S31)$$

#### (4) HKY85 model

We can get estimated  $\kappa_{HKY85}$  and  $\bar{\kappa}_{HKY85}$  using the following formulae (9, 10):

$$\kappa_{HKY85} = 1 + \frac{g_T g_C / g_Y + g_A g_G / g_R}{g_T g_C + g_A g_G} \kappa_{F84} \quad (S32)$$

$$\bar{\kappa}_{HKY85} = 1 + \frac{g_T g_C / g_Y + g_A g_G / g_R}{g_T g_C + g_A g_G} \bar{\kappa}_{F84} \quad (S33)$$

#### (5) TN93 model

We directly describe the proportion of nucleotide sites showing transitional differences between purines ( $P_1$ ) and between pyrimidines ( $P_2$ ) and of those showing transversional differences ( $Q$ ) between two sequences that diverged  $t$  evolutionary time units ago:

$$P_1 = \frac{2g_A g_G}{g_R} \{g_R + g_Y \exp(-\beta t) - \exp[-(g_R \alpha_1 + g_Y \beta)t]\} \quad (S34)$$

$$P_2 = \frac{2g_T g_C}{g_Y} \{g_Y + g_R \exp(-\beta t) - \exp[-(g_Y \alpha_2 + g_R \beta)t]\} \quad (S35)$$

$$Q = 2g_R g_Y [1 - \exp(-\beta t)] \quad (\text{S36})$$

Then, we can get the transformations:

$$\alpha_1 t = \frac{1}{g_R} \left[ g_Y \log_e \left( 1 - \frac{1}{2g_R g_Y} Q \right) - \log_e \left( 1 - \frac{g_R}{2g_A g_G} P_1 - \frac{1}{2g_R} Q \right) \right] \quad (\text{S37})$$

$$\alpha_2 t = \frac{1}{g_Y} \left[ g_R \log_e \left( 1 - \frac{1}{2g_R g_Y} Q \right) - \log_e \left( 1 - \frac{g_Y}{2g_T g_C} P_2 - \frac{1}{2g_Y} Q \right) \right] \quad (\text{S38})$$

$$\beta t = -\log_e \left( 1 - \frac{1}{2g_R g_Y} Q \right) \quad (\text{S39})$$

Let

$$h = \log_e \left( 1 - \frac{g_R}{2g_A g_G} P_1 - \frac{1}{2g_R} Q \right) \quad (\text{S40})$$

$$i = \log_e \left( 1 - \frac{g_Y}{2g_T g_C} P_2 - \frac{1}{2g_Y} Q \right) \quad (\text{S41})$$

$$j = \log_e \left( 1 - \frac{1}{2g_R g_Y} Q \right) \quad (\text{S42})$$

We can get

$$\begin{aligned} d &= 2g_A g_G \alpha_1 t + 2g_T g_C \alpha_2 t + 2g_R g_Y \beta t \\ &= -\frac{2g_A g_G}{g_R} h - \frac{2g_T g_C}{g_Y} i + \left( \frac{2g_A g_G g_Y}{g_R} + \frac{2g_T g_C g_R}{g_Y} - 2g_R g_Y \right) j \end{aligned} \quad (\text{S43})$$

$$\kappa_R = \frac{\alpha_1}{\beta} = \frac{h - g_Y \times j}{g_R \times j} \quad (\text{S44})$$

$$\kappa_Y = \frac{\alpha_2}{\beta} = \frac{i - g_R \times j}{g_Y \times j} \quad (\text{S45})$$

Therefore, if  $\lambda$  or  $\alpha_1$ ,  $\alpha_2$  and  $\beta$  follows the gamma distribution, the means of  $P_1$ ,  $P_2$ , and  $Q$  are given by (6):

$$\overline{P_1} = \int_0^\infty P_1 f(\lambda) d\lambda = \frac{2g_A g_G}{g_R} \left\{ g_R - \left[ \frac{a}{a + (g_R \alpha_1 + g_Y \beta)t} \right]^a + g_Y \left( \frac{a}{a + \beta t} \right)^a \right\} \quad (\text{S46})$$

$$\overline{P_2} = \int_0^\infty P_2 f(\lambda) d\lambda = \frac{2g_T g_C}{g_Y} \left\{ g_Y - \left[ \frac{a}{a + (g_Y \alpha_2 + g_R \beta)t} \right]^a + g_R \left( \frac{a}{a + \beta t} \right)^a \right\} \quad (\text{S47})$$

$$\bar{Q} = \int_0^\infty Qf(\lambda)d\lambda = 2g_R g_Y \left[ 1 - \left( \frac{a}{a + \beta t} \right)^a \right] \quad (S48)$$

Then, we can get the transformations:

$$\bar{\alpha}_1 t = \frac{a}{g_R} \left[ \left( 1 - \frac{1}{2g_R} \bar{Q} - \frac{g_R}{2g_A g_G} \bar{P}_1 \right)^{-1/a} - g_Y \left( 1 - \frac{1}{2g_R g_Y} \bar{Q} \right)^{-1/a} - g_R \right] \quad (S49)$$

$$\bar{\alpha}_2 t = \frac{a}{g_Y} \left[ \left( 1 - \frac{1}{2g_Y} \bar{Q} - \frac{g_Y}{2g_T g_C} \bar{P}_2 \right)^{-1/a} - g_R \left( 1 - \frac{1}{2g_R g_Y} \bar{Q} \right)^{-1/a} - g_Y \right] \quad (S50)$$

$$\bar{\beta} t = a \left[ \left( 1 - \frac{1}{2g_R g_Y} \bar{Q} \right)^{-1/a} - 1 \right] \quad (S51)$$

Let

$$\bar{h} = \left( 1 - \frac{g_R}{2g_A g_G} \bar{P}_1 - \frac{1}{2g_R} \bar{Q} \right)^{-1/a} \quad (S52)$$

$$\bar{i} = \left( 1 - \frac{g_Y}{2g_T g_C} \bar{P}_2 - \frac{1}{2g_Y} \bar{Q} \right)^{-1/a} \quad (S53)$$

$$\bar{j} = \left( 1 - \frac{1}{2g_R g_Y} \bar{Q} \right)^{-1/a} \quad (S54)$$

We can get

$$\begin{aligned} \bar{d} &= 2g_A g_G \bar{\alpha}_1 t + 2g_T g_C \bar{\alpha}_2 t + 2g_R g_Y \bar{\beta} t \\ &= 2a \left[ \frac{g_A g_G}{g_R} \bar{h} + \frac{g_T g_C}{g_Y} \bar{i} + \left( g_R g_Y - \frac{g_A g_G g_Y}{g_R} - \frac{g_T g_C g_R}{g_Y} \right) \bar{j} - g_A g_G - g_T g_C - g_R g_Y \right] \end{aligned} \quad (S55)$$

$$\bar{\kappa}_R = \bar{\alpha}_1 / \bar{\beta} = \frac{\bar{h} - g_Y \times \bar{j} - g_R}{g_R \times \bar{j} - g_R} \quad (S56)$$

$$\bar{\kappa}_Y = \bar{\alpha}_2 / \bar{\beta} = \frac{\bar{i} - g_R \times \bar{j} - g_Y}{g_Y \times \bar{j} - g_Y} \quad (S57)$$

## References

1. Yang, Z. 2006. *Computational Molecular Evolution*. Oxford University Press, New York, USA.
2. Jukes, T.H. and Cantor, C.R. 1969. Evolution of protein molecules. In *Mammalian Protein Metabolism* (ed. Munro, H.N.), vol. III, pp. 21-132. Academic Press, New York, USA.
3. Kimura, M. 1980. A simple method for estimating evolutionary rates of base substitutions through comparative studies of nucleotide sequences. *J. Mol. Evol.* 16: 111-120.
4. Felsenstein, J. 1984. Distance methods for inferring evolutionary trees: a justification. *Evolution* 38: 16-24.
5. Hasegawa, M., *et al.* 1985. Dating of the human-ape splitting by a molecular clock of mitochondrial DNA. *J. Mol. Evol.* 22: 160-174.
6. Tamura, K. and Nei, M. 1993. Estimation of the number of nucleotide substitutions in the control region of mitochondrial DNA in humans and chimpanzees. *Mol. Biol. Evol.* 10: 512-526.
7. Nei, M. and Gojobori, T. 1986. Simple methods for estimating the numbers of synonymous and nonsynonymous nucleotide substitutions. *Mol. Biol. Evol.* 3: 418-426.
8. Jin, L. and Nei, M. 1990. Limitations of the evolutionary parsimony method of phylogenetic analysis. *Mol. Biol. Evol.* 7: 82-102.
9. Goldman N. 1993. Statistical tests of models of DNA substitution. *J. Mol. Evol.* 36: 182-198.
10. Yang, Z. and Nielsen, R. 2000. Estimating synonymous and nonsynonymous substitution rates under realistic evolutionary models. *Mol. Biol. Evol.* 17: 32-43.
